# Supplementary material
Source: Springer Nature journal article supplement (https://www.springermedizin.de/resource/supplementary/12889_2006_1021_MOESM2_ESM.pdf/9503152)

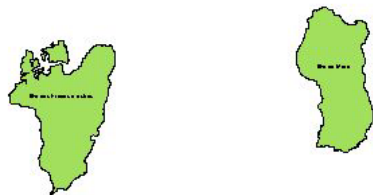

- 1 - Fwamba
- 2 - Kapangwe
- 3 - Dowa
- 4 - Chipinge
- 5 - Chipinge
- 6 - Chipinge
- 7 - Chipinge
- 8 - Chipinge
- 9 - Chipinge
- 10 - Chipinge
- 11 - Chipinge
- 12 - Chipinge
- 13 - Chipinge
- 14 - Chipinge
- 15 - Chipinge
- 16 - Chipinge
- 17 - Chipinge
- 18 - Chipinge
- 19 - Chipinge
- 20 - Chipinge
- 21 - Chipinge
- 22 - Chipinge
- 23 - Chipinge
- 24 - Chipinge
- 25 - Chipinge
- 26 - Chipinge
- 27 - Chipinge
- 28 - Chipinge
- 29 - Chipinge
- 30 - Chipinge
- 31 - Chipinge
- 32 - Chipinge
- 33 - Chipinge
- 34 - Chipinge
- 35 - Chipinge
- 36 - Chipinge
- 37 - Chipinge
- 38 - Chipinge
- 39 - Chipinge
- 40 - Chipinge
- 41 - Chipinge
- 42 - Chipinge
- 43 - Chipinge
- 44 - Chipinge
- 45 - Chipinge
- 46 - Chipinge
- 47 - Chipinge
- 48 - Chipinge
- 49 - Chipinge
- 50 - Chipinge
- 51 - Chipinge
- 52 - Chipinge
- 53 - Chipinge
- 54 - Chipinge
- 55 - Chipinge
- 56 - Chipinge
- 57 - Chipinge
- 58 - Chipinge
- 59 - Chipinge
- 60 - Chipinge
- 61 - Chipinge
- 62 - Chipinge
- 63 - Chipinge
- 64 - Chipinge
- 65 - Chipinge
- 66 - Chipinge
- 67 - Chipinge
- 68 - Chipinge
- 69 - Chipinge
- 70 - Chipinge
- 71 - Chipinge
- 72 - Chipinge
- 73 - Chipinge
- 74 - Chipinge
- 75 - Chipinge
- 76 - Chipinge
- 77 - Chipinge
- 78 - Chipinge
- 79 - Chipinge
- 80 - Chipinge
- 81 - Chipinge
- 82 - Chipinge
- 83 - Chipinge
- 84 - Chipinge
- 85 - Chipinge
- 86 - Chipinge
- 87 - Chipinge
- 88 - Chipinge
- 89 - Chipinge
- 90 - Chipinge
- 91 - Chipinge
- 92 - Chipinge
- 93 - Chipinge
- 94 - Chipinge
- 95 - Chipinge
- 96 - Chipinge
- 97 - Chipinge
- 98 - Chipinge
- 99 - Chipinge
- 100 - Chipinge

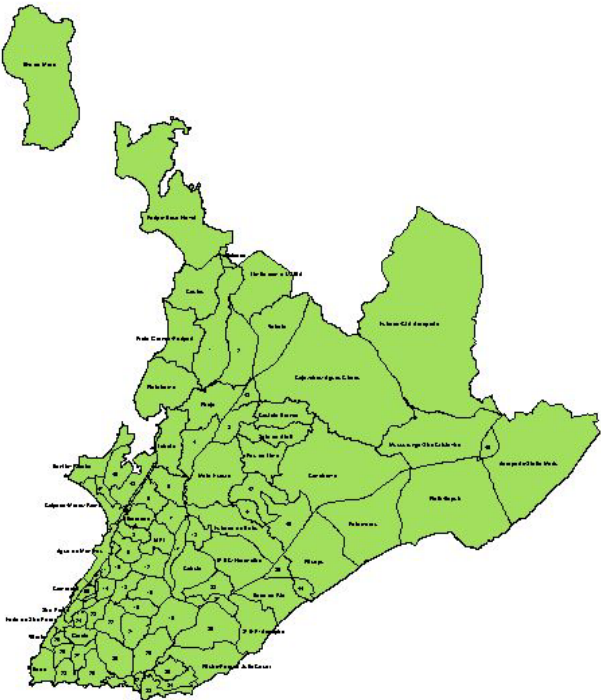

Malhazi\_ssa.shp

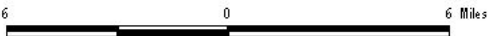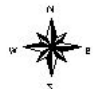

Supplement: MOESM2 [file 9503152]
